# Supplementary material
Source: PubMed Central journal article supplement (PMC3378092)
Supplement: supp_00129.2010_Preparation_of_cell_lysate.pdf [file supp_00129.2010_Preparation_of_cell_lysate.pdf]

### **Preparation of cell lysate, nuclear proteins, and Western blots**

Pancreatic acinar cells were washed, scraped from the culture well or dish and sonicated with ice-cold buffer as previously described (19, 60). The supernatant was prepared for SDS-PAGE after which protein was transferred to nitrocellulose membrane and western blotting was conducted using specific antibodies (16). For all Western blot experiments duplicate culture wells were used for each experimental condition and run on adjacent lanes of SDS gels. After exposing blots to X-ray film, the film was scanned and both lanes were used to quantitate the signal. For representative samples the images were electronically cut and only one lane of a representative gel was shown. For this reason, the lanes are separated by a white line.
