# Supplementary material
Source: PubMed Central journal article supplement (PMC3378092)

Fig. 6

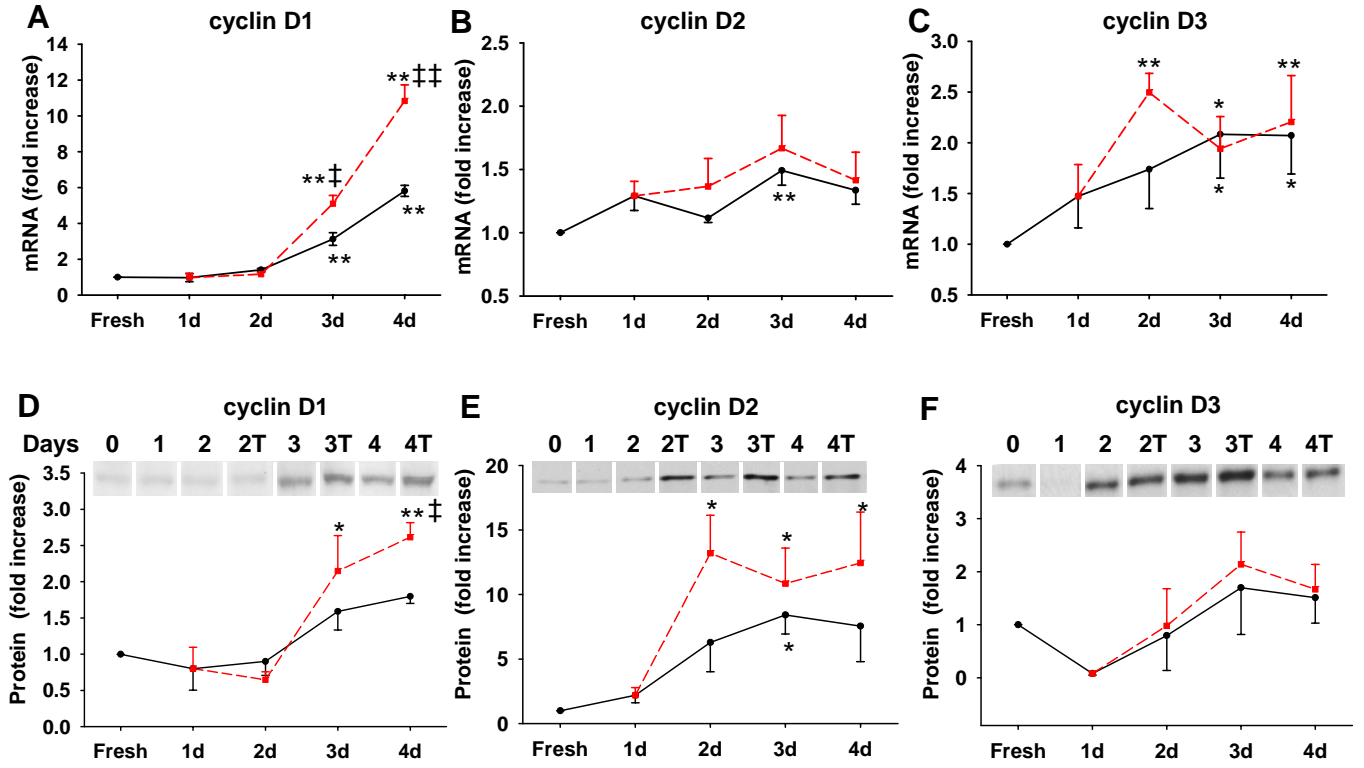

Fig. 7

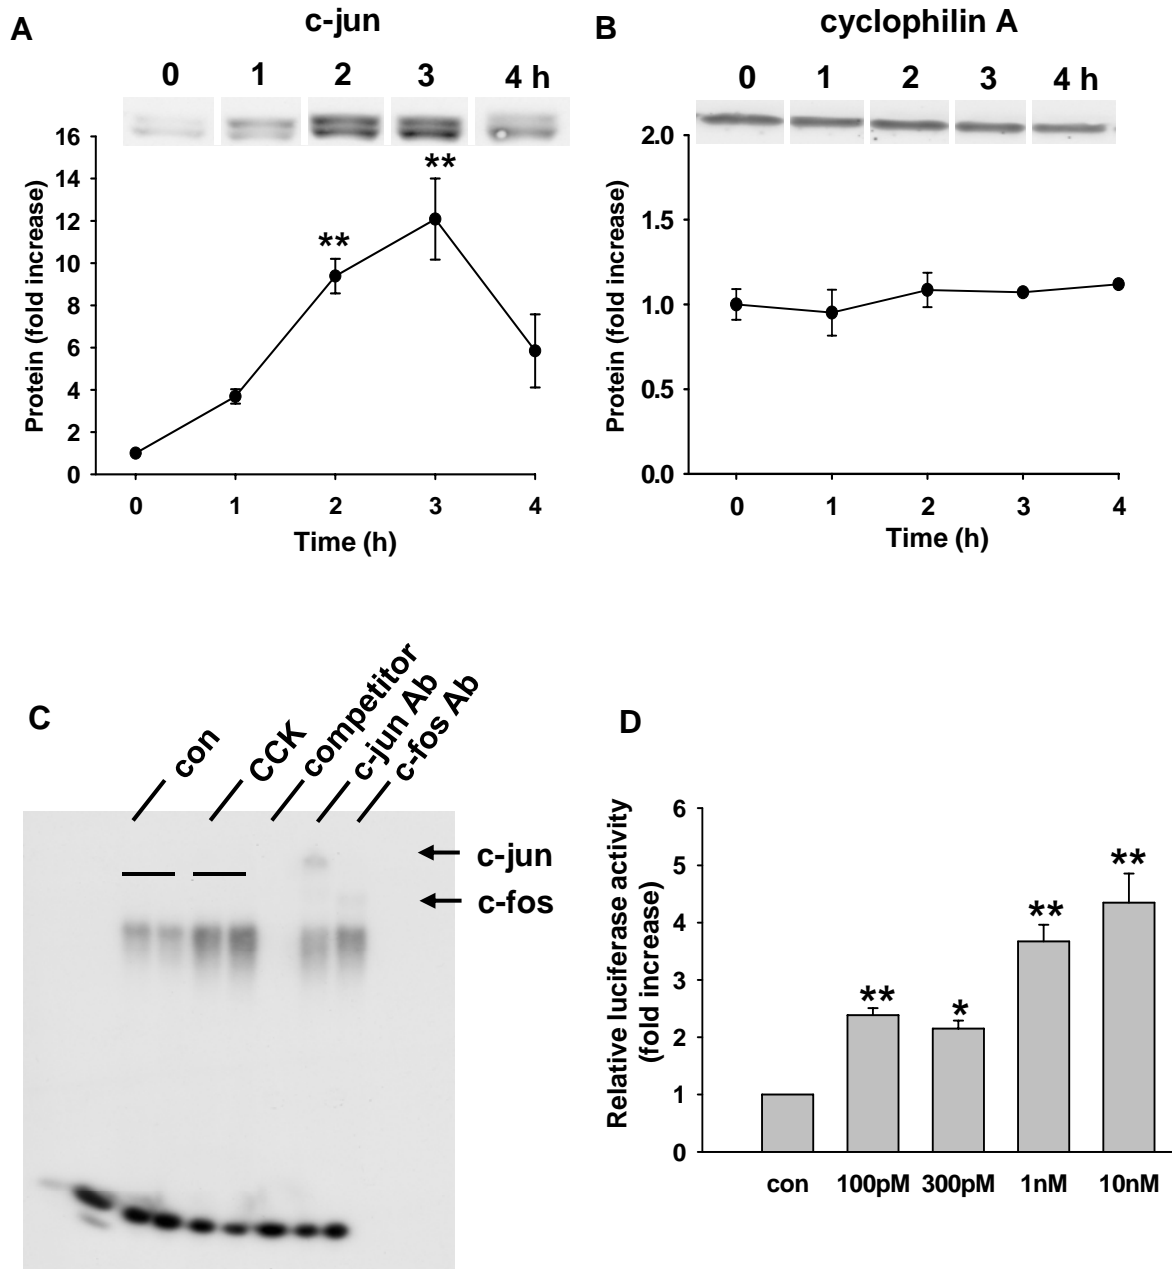

Fig.8

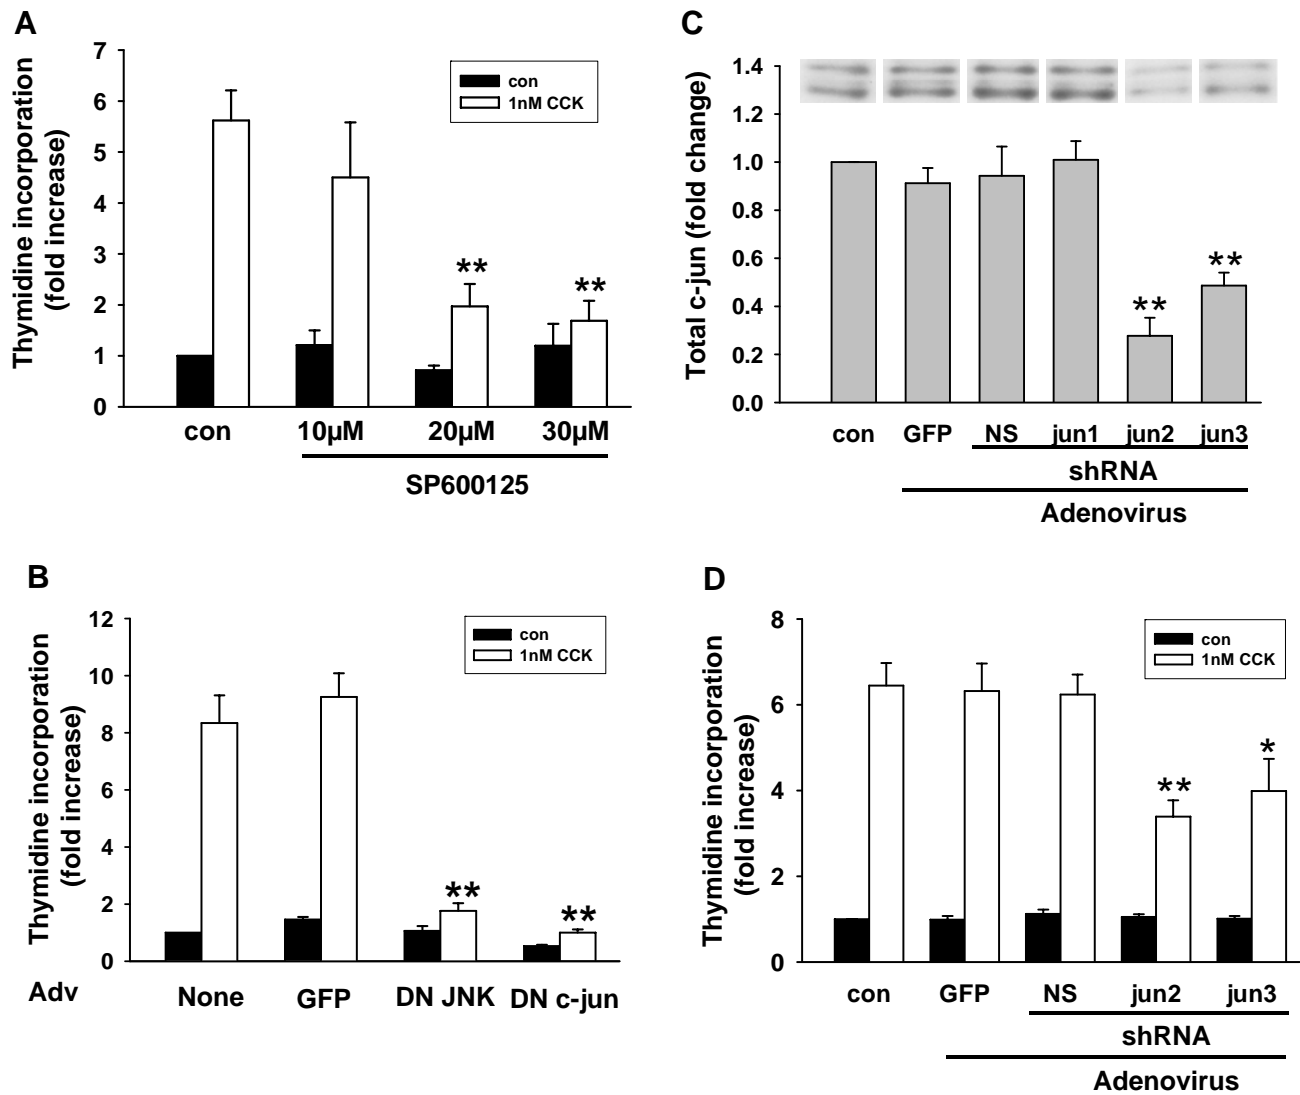

Fig. 11

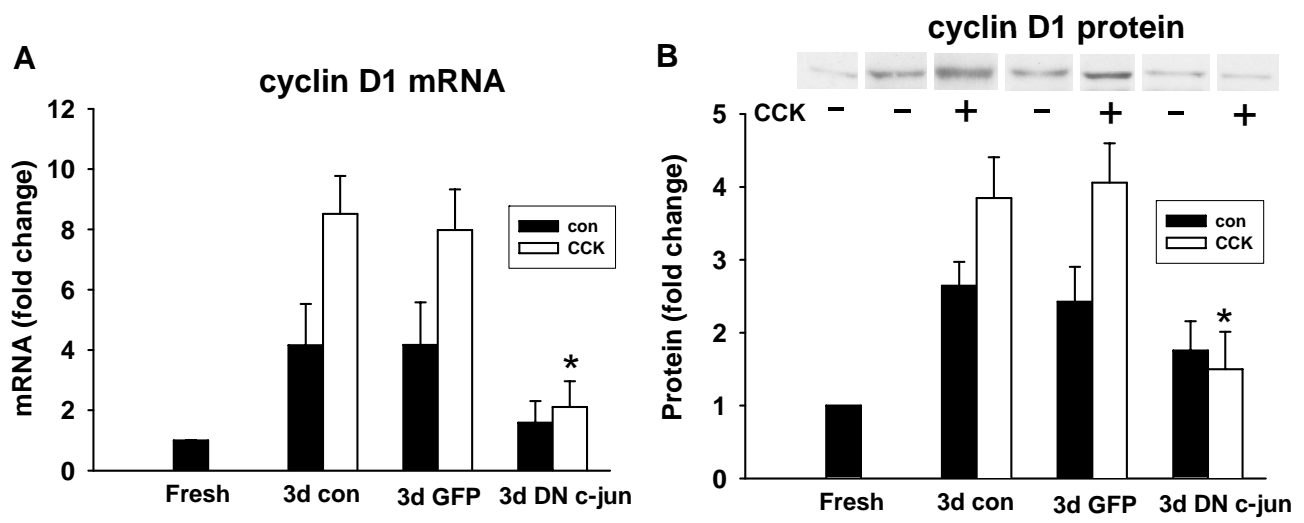

Fig. 12

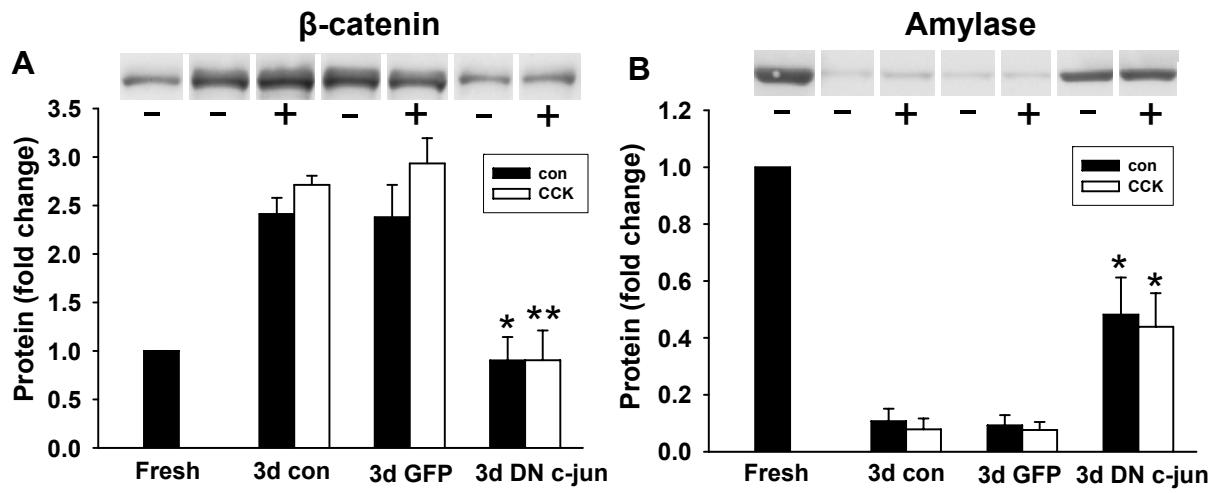

Supplement: supp_00129.2010_Guo_et_al_R-COMBINED-FIGURES.pdf [file supp_00129.2010_Guo_et_al_R-COMBINED-FIGURES.pdf]
